# Supplementary material for: Indirect climate impacts of the Hunga eruption
Source: Copernicus journal article supplement (doi:10.5194/acp-26-197-2026), 2026-01-07
Supplement: Supplementary file 1 [file acp-26-197-2026-supplement.pdf]

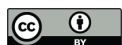

*Supplement of*

## **Indirect climate impacts of the Hunga eruption**

**Ewa M. Bednarz et al.**

*Correspondence to:* Ewa M. Bednarz ([ewa.bednarz@noaa.gov](mailto:ewa.bednarz@noaa.gov))

The copyright of individual parts of the supplement might differ from the article licence.

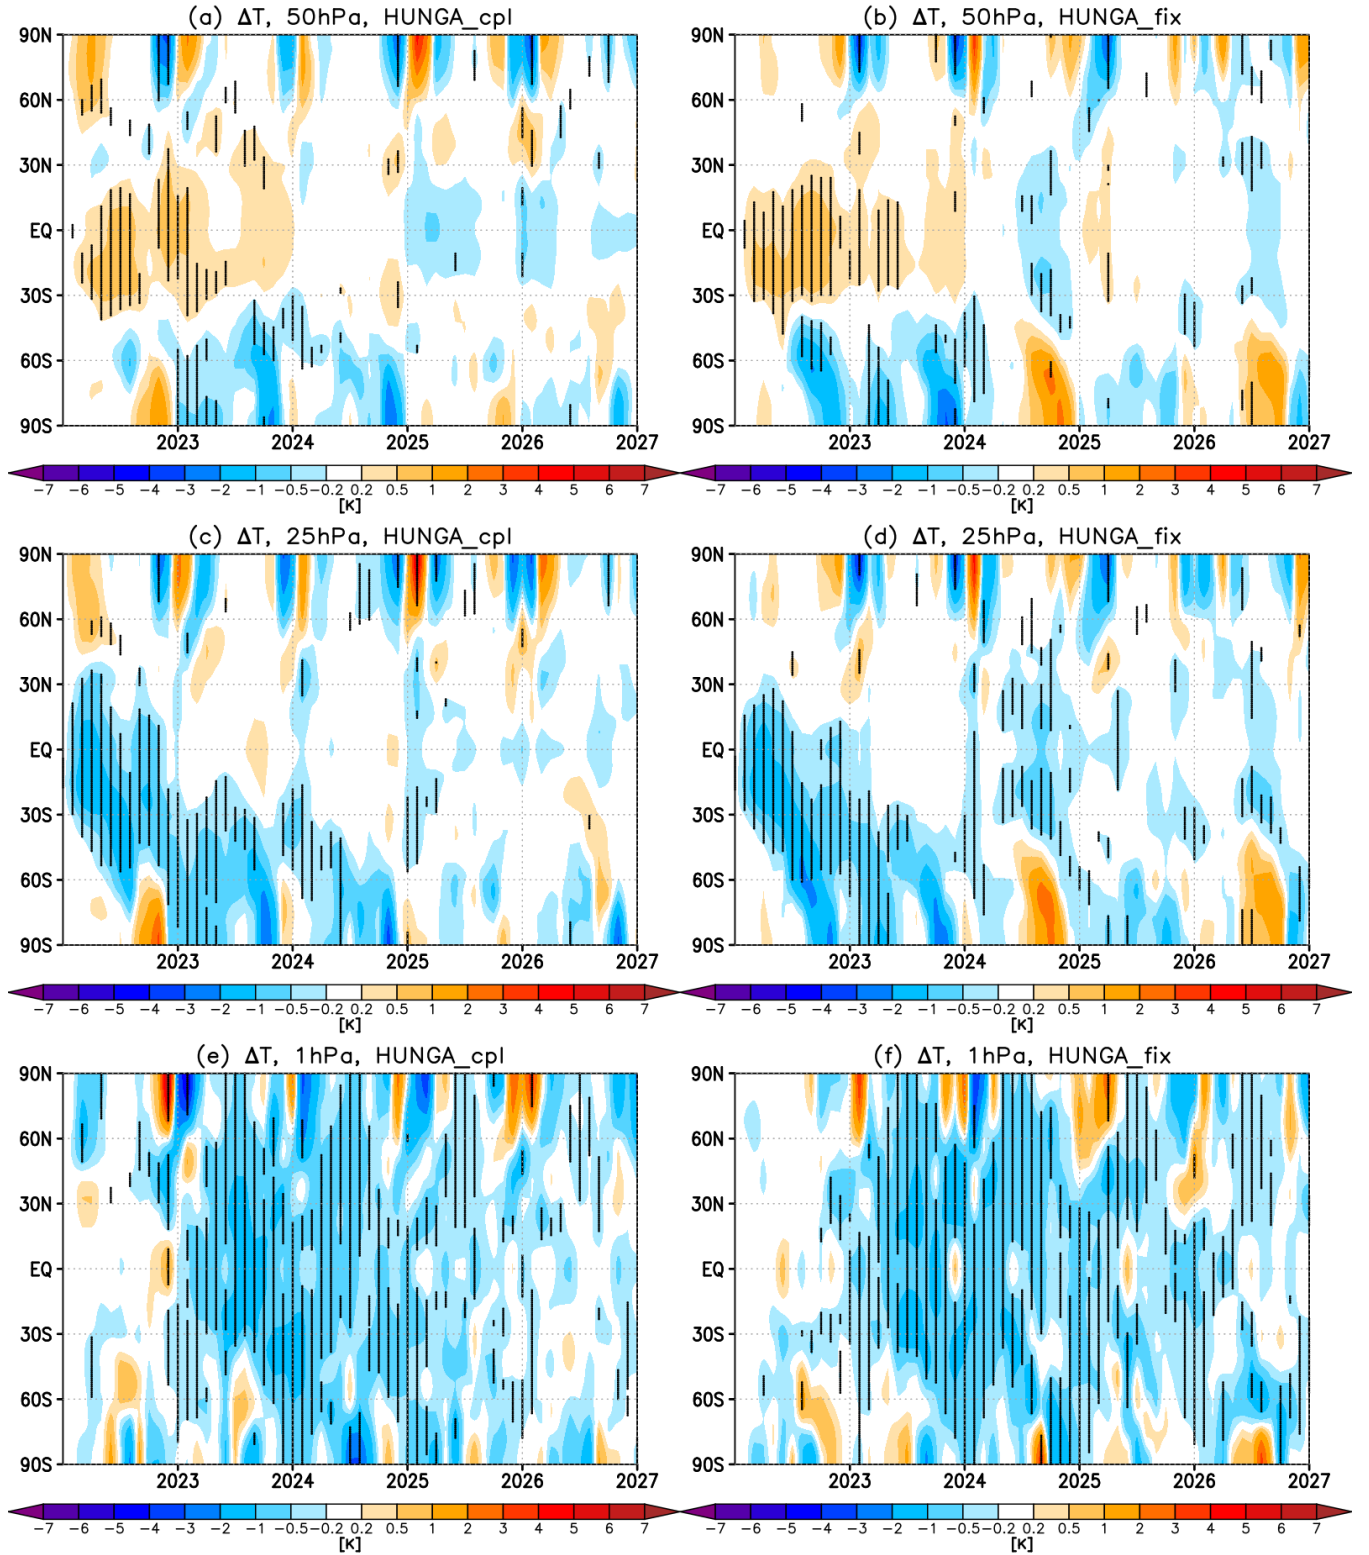

**Figure S1.** Timeseries of zonal mean temperature changes at (a-b) 50 hPa, (c-d) 25 hPa, and (e-f) 1 hPa between the forced simulation and the control for the coupled ocean (left) and atmosphere-only (right) simulations. Stippling denotes statistical significance (as in Fig. 1).

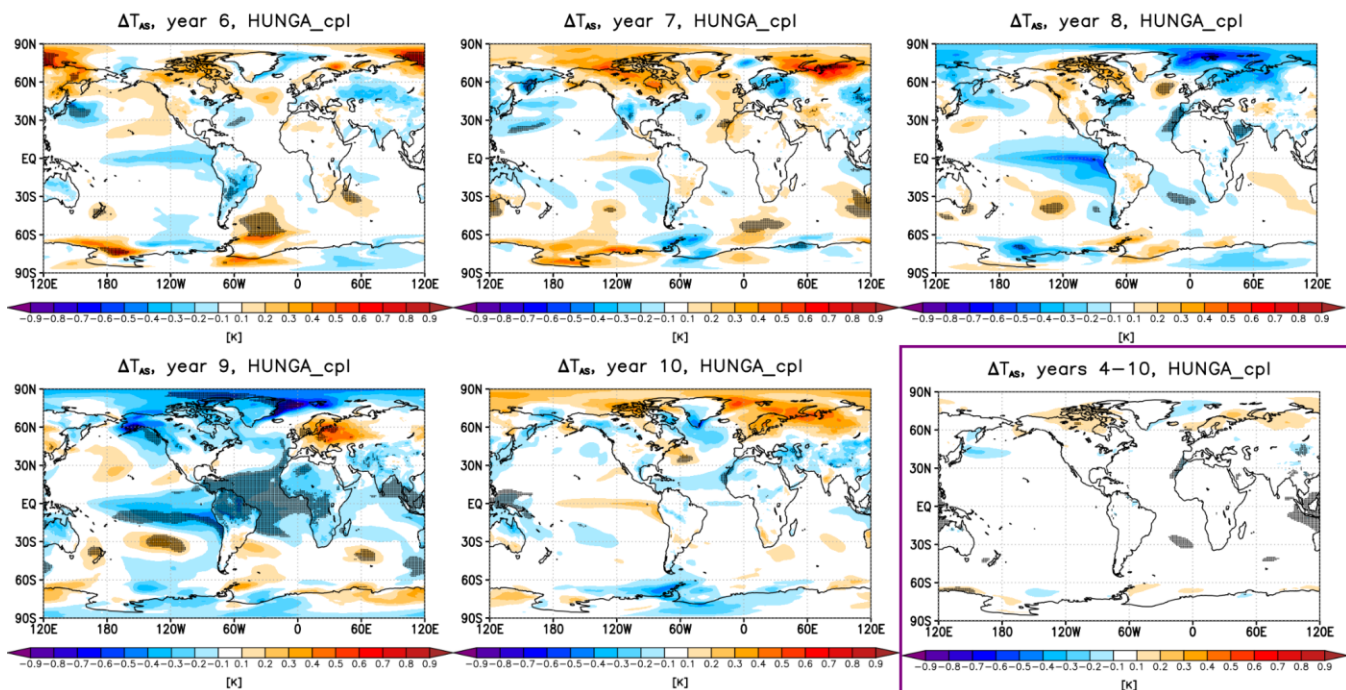

**Figure S2.** As in Fig. 2 of the main paper but for years 6-10.

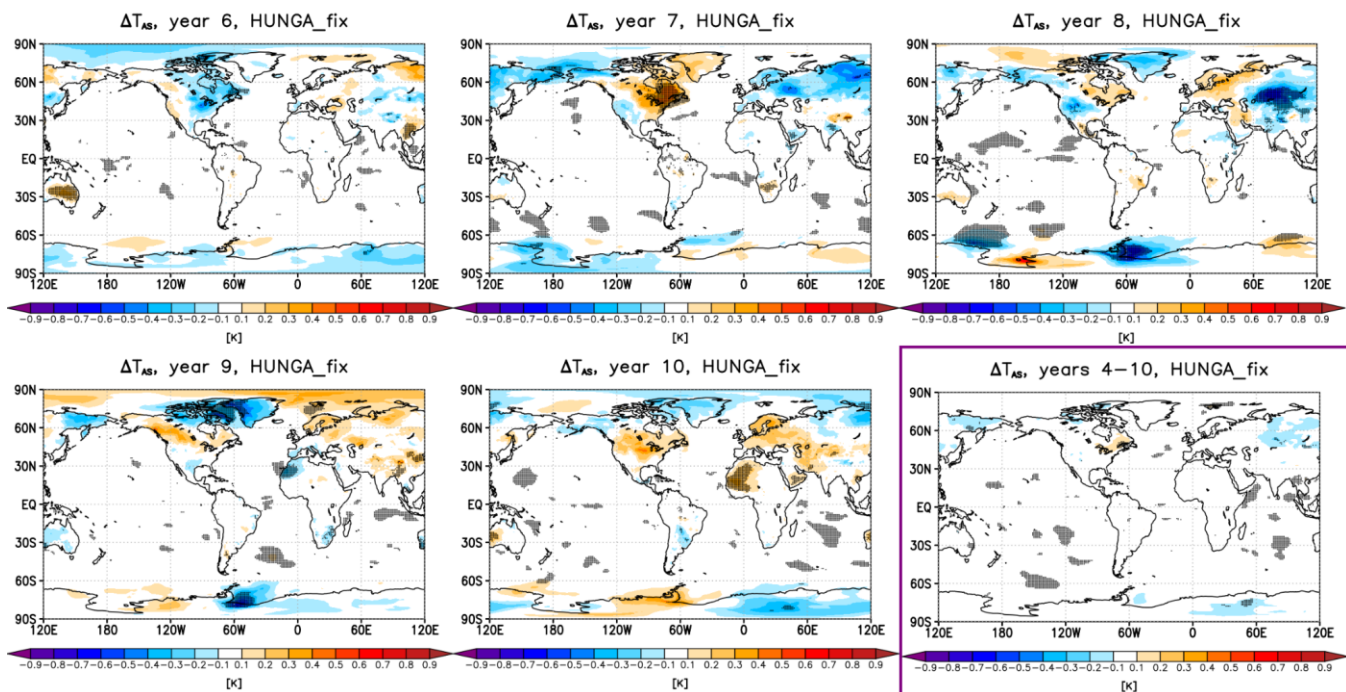

**Figure S3.** As in Fig. 3 of the main paper but for years 6-10.

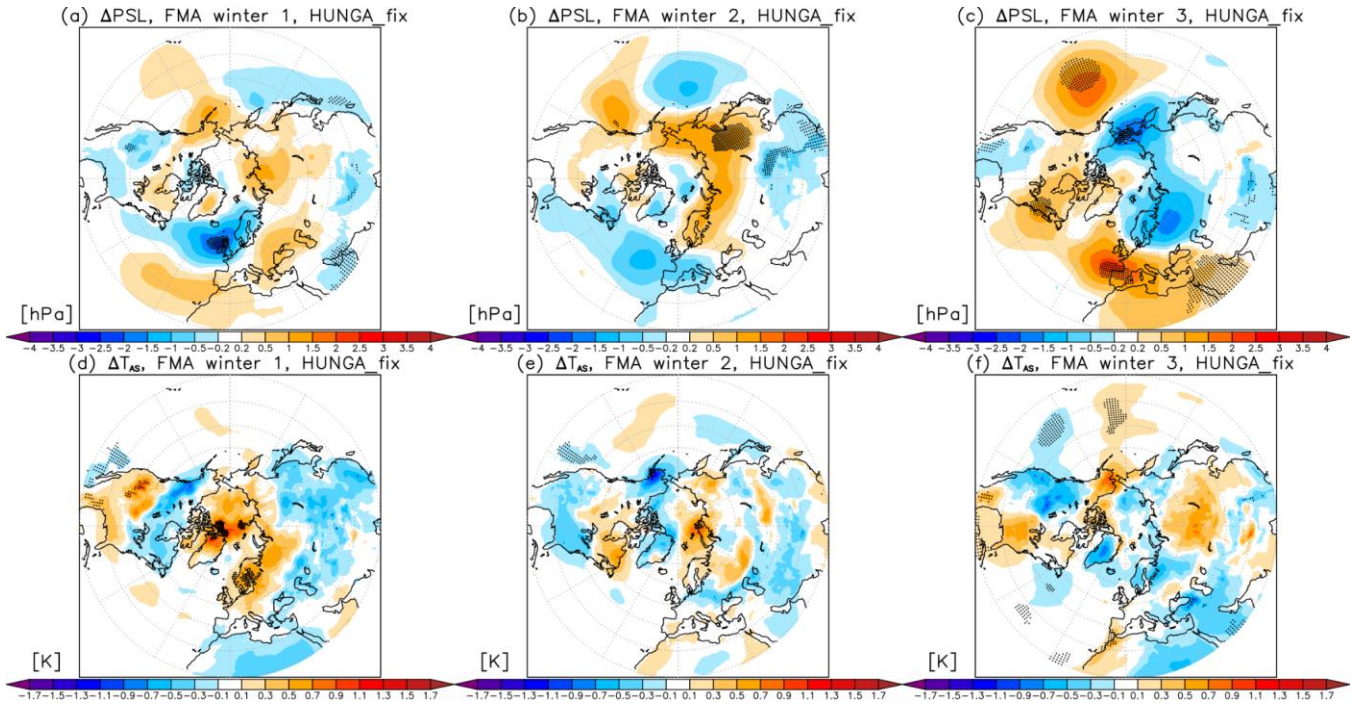

**Figure S4.** As in Fig. 7 of the main paper but for the changes in the atmosphere-only simulations.

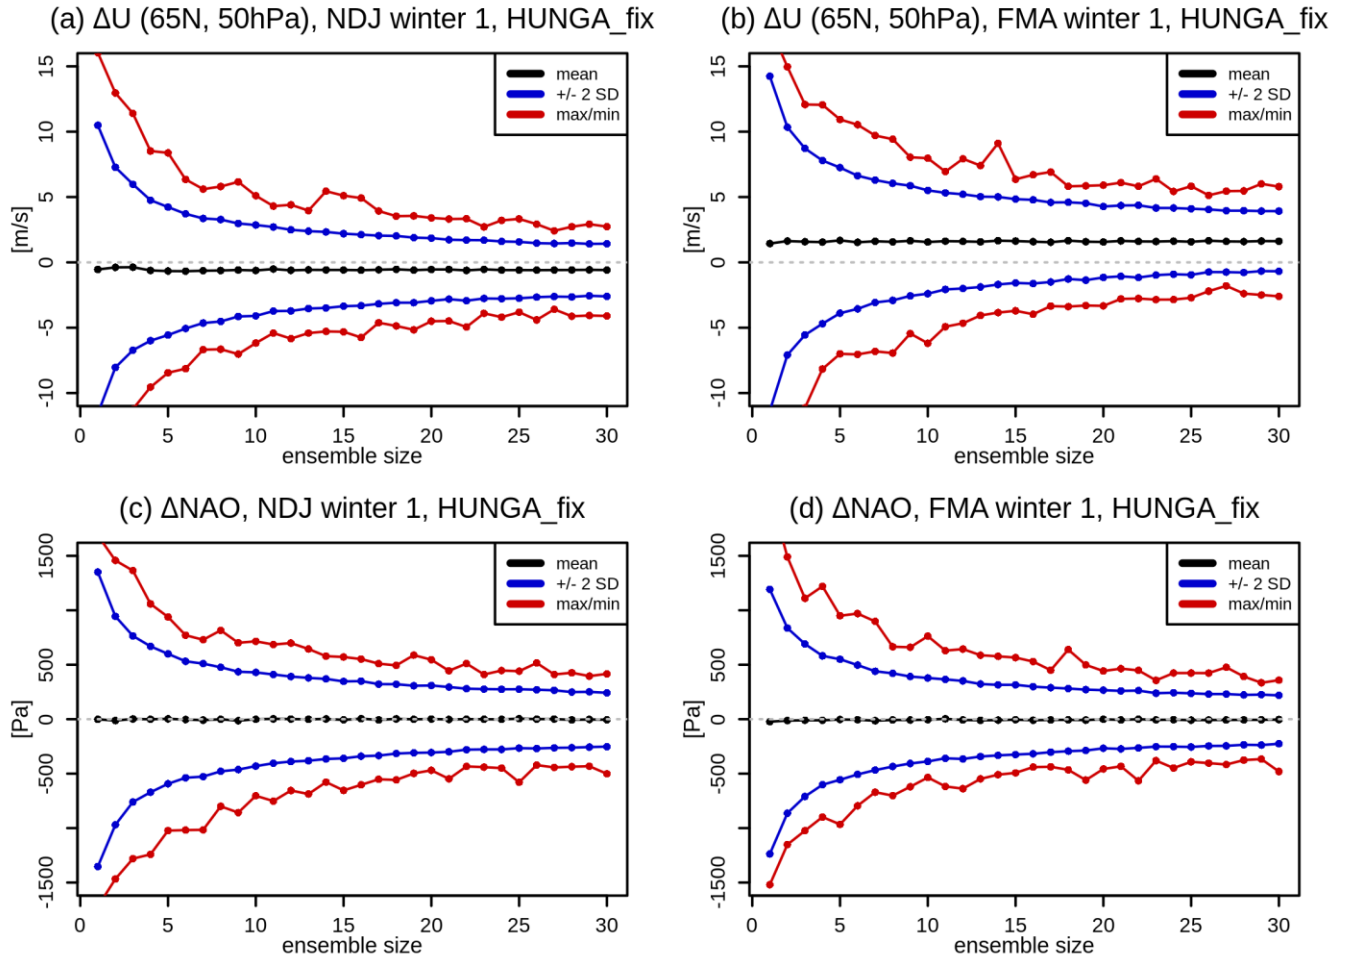

**Figure S5.** As in Fig. 9 of the main paper but for the changes in the atmosphere-only simulations.



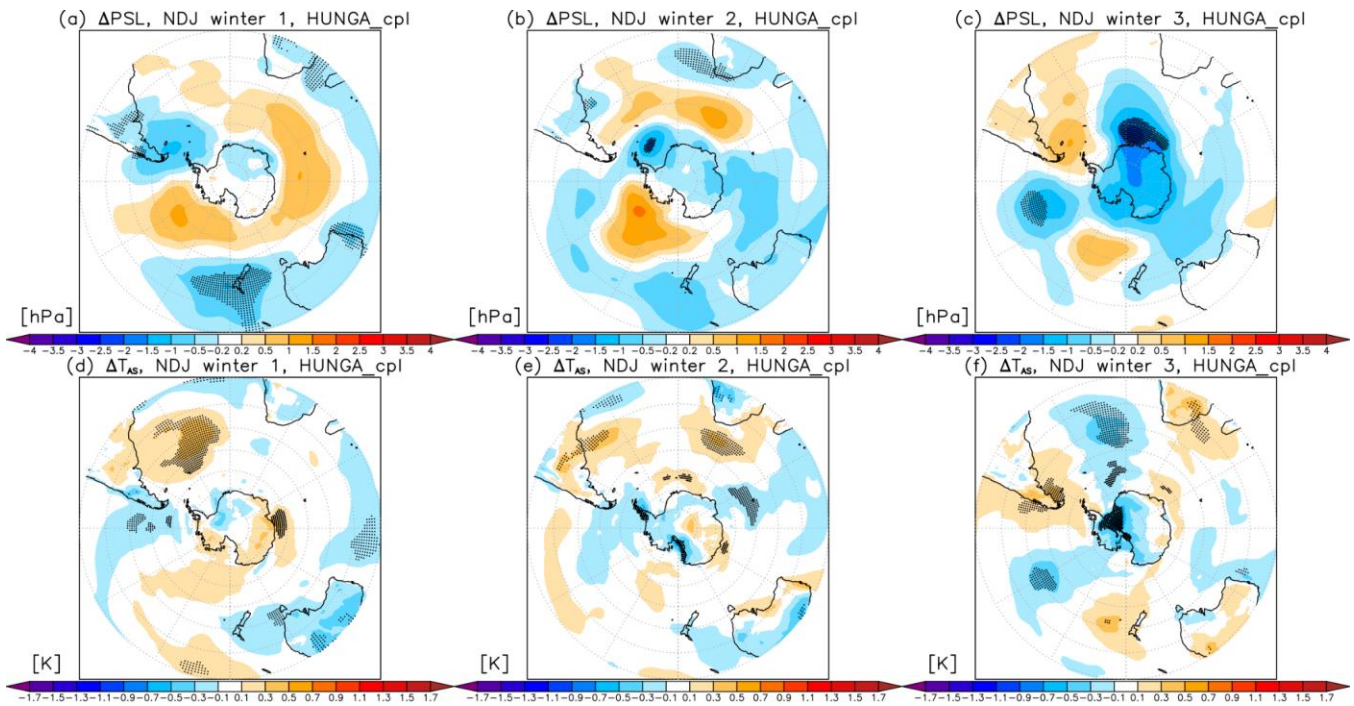

**Figure S6.** As in Fig. 12 of the main paper but for the changes in the coupled ocean simulations.
